# Supplementary material for: Fabrication of the MnO2/PPS-SDBS catalytic filter material for low-temperature selective catalytic reduction of NO with NH3
Source: Royal Society of Chemistry journal article supplement (doi:10.1039/d2nj02920k), 2022-01-01
Supplement: d2nj02920k1.pdf [file d2nj02920k1.pdf]

## Electronic Supplementary Information

### Fabrication of MnO<sub>2</sub>/PPS-SDBS catalytic filter material for low-temperature selective catalytic reduction of NO with NH<sub>3</sub>

Xie Wang <sup>a</sup>, YanbingZhang <sup>b,\*</sup>, Hao Guo <sup>b</sup>, Dahai Chen <sup>b</sup>, Huan Wang <sup>a</sup>, Caihong Jiang <sup>a</sup>,  
Junwei Wang <sup>a,\*</sup>, Yu Zhang <sup>a</sup>, Xulong Jiang <sup>a</sup>

<sup>a</sup> Anhui Province Key Laboratory of Optoelectronic and Magnetism Functional Materials, School of Chemistry and Chemical Engineering, Anqing Normal University, Anqing 246011, China

<sup>b</sup> College of Materials and Chemical Engineering, Henan University of Urban Construction, Pingdingshan 467000, China

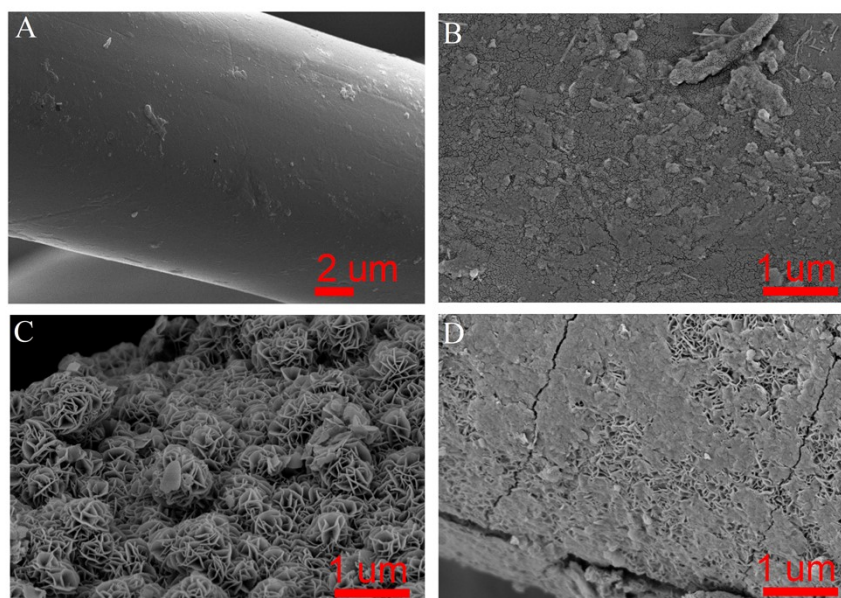

Figure S1 FESEM images of PPS (A) and the 1.0 MnO<sub>2</sub>/PPS-SDBS catalytic filter materials prepared with different reaction temperatures and the SDBS concentration is 0.25 g/L. 70°C (B), 80°C (C), and 90°C (D).

---

\* Corresponding authors: zyb481428@163.com (Y. Zhang), wangjunweilotus@163.com (J. Wang).

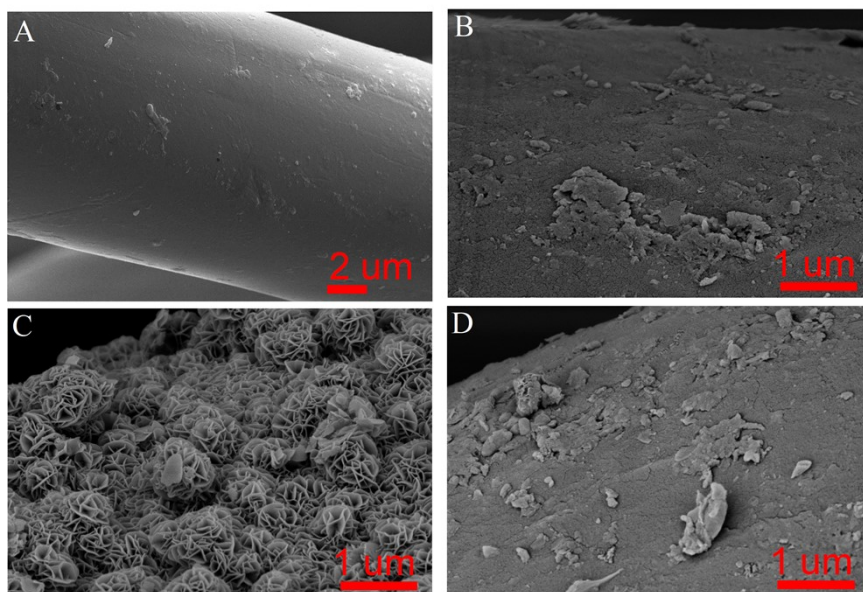

Figure S2 FESEM images of PPS (A) and the 1.0 MnO<sub>2</sub>/PPS-SDBS catalytic filter materials prepared with different SDBS concentrations and reaction temperature is 80 °C.

0.20 g/L SDBS (B), 0.25 g/L SDBS (C), and 0.30 g/L SDBS (D).
